# Supplementary material
Source: Research Square preprint supplement (doi:10.21203/rs.3.rs-9684567/v1)
Supplement: Supplementary file 1 [file 538e08bdf486aca081b75861.docx]

**STROBE Statement**—Checklist of items that should be included in reports of ***cohort studies***

|  | Item No | Recommendation | Page No |
| --- | --- | --- | --- |
| **Title and abstract** | 1 | (*a*) Indicate the study’s design with a commonly used term in the title or the abstract | Page 3- “We conducted a prospective, single-centre observational cohort study” |
| (*b*) Provide in the abstract an informative and balanced summary of what was done and what was found | Pages 3 and 4- **“**Adult patients with spontaneous ICH requiring invasive multimodal brain monitoring were consecutively enrolled. Continuous monitoring included ICP, CPP, pressure reactivity index (PRx), and bedside optimal CPP (CPPopt). PbtO₂ monitoring was applied opportunistically due to logistical constraints. Neuromonitoring data were analyzed during the first 48 h and between days 3-7. Associations between PbtO₂, CPP, PRx, and systemic oxygenation were explored using paired comparisons and multivariable linear regression. (…) In critically ill patients with spontaneous ICH, brain tissue oxygenation, evaluated with PbtO₂, remains suboptimal despite controlled ICP, elevated CPP, and adequate systemic oxygenation.” |
| Introduction | | | |
| Background/rationale | 2 | Explain the scientific background and rationale for the investigation being reported | Page 6- “PbtO₂-targeted therapeutic strategies are applied in traumatic brain injury. In spontaneous ICH, PbtO2 monitoring remains insufficiently underexplored, and its potential contribution to individualized management not defined. Moreover, the clinical diagnosis of spontaneous ICH may not fully capture the underlying vascular pathology (…)” |
| Objectives | 3 | State specific objectives, including any prespecified hypotheses | Page 6- “The aim of this prospective observational study was to characterize brain tissue oxygenation profile of critically ill patients with spontaneous ICH during the first 48 hours and in the period of days 3-7, and to describe its association with intracranial pressure, cerebral perfusion pressure, and cerebrovascular autoregulation in a setting of optimized, individualized neurocritical care.” |
| Methods | | | |
| Study design | 4 | Present key elements of study design early in the paper | Page 7- “We conducted a prospective, single-centre observational cohort study (…)” |
| Setting | 5 | Describe the setting, locations, and relevant dates, including periods of recruitment, exposure, follow-up, and data collection | Page 7- “(…) in the Neurocritical Care Unit (NCCU) of ULS São João, Porto (…) Patient recruitment occurred consecutively between January 2021 and March 2023.” |
| Participants | 6 | (*a*) Give the eligibility criteria, and the sources and methods of selection of participants. Describe methods of follow-up | Page 7 - “Adult patients (>18 years) admitted to the NCCU with a diagnosis of spontaneous intracerebral hemorrhage (ICH), confirmed by admission brain computed tomography (CT), were eligible for inclusion. Only patients requiring invasive multimodal brain monitoring and managed under deep sedation and mechanical ventilation were considered for the study. Inclusion criteria comprised spontaneous ICH of any location and indication for invasive multimodal neuromonitoring according to institutional neurocritical care practice. Additionally, availability of valid neuromonitoring data for a minimum of 48 consecutive hours was a requisite for inclusion.” |
| (*b*)For matched studies, give matching criteria and number of exposed and unexposed | Not applicable. The study didn’t use a matched-pair design. |
| Variables | 7 | Clearly define all outcomes, exposures, predictors, potential confounders, and effect modifiers. Give diagnostic criteria, if applicable | Page 10- “Physiological data, including ICP, CPP, PRx, CPPopt, and PbtO₂, were continuously recorded and integrated using the ICM+® software. Admission clinical variables included age, sex, and previous comorbidities, medication, and neuroimaging characteristics. (…) Therapeutic interventions, including surgical procedures (hematoma evacuation, decompressive craniectomy, or both) and the presence of an external ventricular drain, were also recorded.” |
| Data sources/ measurement | 8* | For each variable of interest, give sources of data and details of methods of assessment (measurement). Describe comparability of assessment methods if there is more than one group | Page 10 “Physiological data, including ICP, CPP, PRx, CPPopt, and PbtO₂, were continuously recorded and integrated using the ICM+® software. (…) Neuroimaging data were obtained from admission brain CT scans” |
| Bias | 9 | Describe any efforts to address potential sources of bias | Page 10- “To minimize potential sources of bias, patients were prospectively enrolled and managed exclusively within a single NCCU, using uniform treatment protocols and standardized neuromonitoring techniques. All measurements were obtained using the same equipment and software platforms.” |
| Study size | 10 | Explain how the study size was arrived at | Page 10- “An a priori sample size estimation indicated that a minimum of 25 patients would provide 80% statistical power for exploratory analyses. During the study period, 31 consecutive patients fulfilling inclusion criteria were enrolled” |
| Quantitative variables | 11 | Explain how quantitative variables were handled in the analyses. If applicable, describe which groupings were chosen and why | Page 11- “Continuous variables are presented as medians with interquartile ranges, and categorical variables as counts with percentages. Baseline demographic and clinical characteristics were summarized descriptively.” |
| Statistical methods | 12 | (*a*) Describe all statistical methods, including those used to control for confounding | Page 11- “For patients undergoing PbtO₂ monitoring, neuromonitoring parameters were compared between 0–48 h and 3–7 days periods using paired Wilcoxon signed-rank tests, including only patients with complete data in both periods. Similar intra-patient comparisons were performed for ICP, CPP, and PRx in the full cohort.  The association between PbtO₂ and systemic oxygenation, assessed by the paO₂/FiO₂ ratio, was explored using Spearman’s rank correlation coefficient during the first 48 hours and during days 3–7.  Linear regression models were fitted to explore the association between mean PbtO₂, CPP and PRx during each monitoring period. Separate models were built for the first 48 hours and for days 3–7, including CPP and PRx as covariates. Results are reported as beta coefficients with 95% confidence intervals.  Statistical analyses were performed using R software (R Foundation for Statistical Computing, Vienna, Austria).”  ” |
| (*b*) Describe any methods used to examine subgroups and interactions | Page 11- “using paired Wilcoxon signed-rank tests” and “multivariable linear regression model”. |
| (*c*) Explain how missing data were addressed | Page 11- “For patients undergoing PbtO₂ monitoring, neuromonitoring parameters were compared between 0–48 h and 3–7 days periods using paired Wilcoxon signed-rank tests, including only patients with complete data in both periods. Similar intra-patient comparisons were performed for ICP, CPP, and PRx in the full cohort.” |
| (*d*) If applicable, explain how loss to follow-up was addressed | Not applicable, the study did not include loss to follow-up. |
| (*e*) Describe any sensitivity analyses | Page 11- “The statistical significance cutoff was set at 0.05.” |
| Results | | |  |
| Participants | 13* | (a) Report numbers of individuals at each stage of study—eg numbers potentially eligible, examined for eligibility, confirmed eligible, included in the study, completing follow-up, and analysed | Page 12- “During the study period, 34 patients were admitted to the Neurocritical Care Unit with a diagnosis of intracerebral hemorrhage. Three patients were excluded according to predefined exclusion criteria (…), resulting in a final study cohort of 31 patients. (…) ICP, CPP and PRx were monitored in all 31 patients, with PbtO₂ monitoring in 18 patients.” |
| (b) Give reasons for non-participation at each stage | Not applicable, all eligible patients who met the inclusion criteria were included in the study. |
| (c) Consider use of a flow diagram | Page 12, Figure 1 |
| Descriptive data | 14* | (a) Give characteristics of study participants (eg demographic, clinical, social) and information on exposures and potential confounders | Page 12- “Baseline demographic, clinical, and radiological characteristics of the study population are summarized in **Table 1**.” |
| (b) Indicate number of participants with missing data for each variable of interest | Page 13- “ICP, CPP and PRx were monitored in all 31 patients, with PbtO₂ monitoring in 18 patients.” |
| (c) Summarise follow-up time (eg, average and total amount) | Page 10- “Neuromonitoring data were analyzed during two predefined periods: first 48 hours after NCCU admission and days 3 to 7.” |
| Outcome data | 15* | Report numbers of outcome events or summary measures over time | Page 16- “Median ICP values remained consistently below 22 mmHg during both analyzed periods, with no statistically significant difference between the two periods (median 8 mmHg [IQR 4.68–11.86] vs. 7.91 mmHg [IQR 5.07–11.16], *p* = 0.50). In contrast, CPP increased significantly from the period 48h and the period days 3-7, with median values rising from 84 mmHg (IQR 79.98–88.37) to 89 mmHg (IQR 85.15–90.91; *p*<0.001). CPPopt values showed a similar upward trend, although the difference did not reach statistical significance. (…) Median PRx decreased from 0.21 (IQR 0.04–0.32) during the first 48 hours to -0.001 (IQR −0.06–0.17) during days 3 to 7 (*p* < 0.001), indicating a gain in autoregulation as time goes on.”;  Page 18- “Among the 18 patients undergoing PbtO₂ monitoring, median values during the first 48 hours were 22mmHg (IQR 19–27), remaining close to the predefined critical threshold for cerebral hypoxia. During days 3-7, median PbtO₂ values were 24 mmHg (IQR 17–27), with no statistically significant difference between periods (p=1.00). Despite stable systemic oxygenation, as reflected by a median paO₂/fiO₂ ratio of 319 (IQR 288–407) during the first 48 hours, half of the patients exhibited PbtO₂ values below 22 mmHg.”;  Page 21- “During the first 48 hours, (…) higher PbtO₂ values tended to cluster within a relatively narrow CPP range, centred around 85 mmHg.” |

| Main results | 16 | (*a*) Give unadjusted estimates and, if applicable, confounder-adjusted estimates and their precision (eg, 95% confidence interval). Make clear which confounders were adjusted for and why they were included | Page 22: “A multivariable linear regression model was fitted to explore independent predictors of mean PbtO₂ during the first 48 hours and 3-7 days, with CPP, PRx entered as covariates.”; Page 22, table 3 |
| --- | --- | --- | --- |
| (*b*) Report category boundaries when continuous variables were categorized | Not applicable. |
| (*c*) If relevant, consider translating estimates of relative risk into absolute risk for a meaningful time period | Not applicable. |
| Other analyses | 17 | Report other analyses done—eg analyses of subgroups and interactions, and sensitivity analyses | Not applicable. |
| Discussion | | | |
| Key results | 18 | Summarise key results with reference to study objectives | Page 23- , 25 and 26- “In this prospective observational cohort study of critically ill ICH patients, we explored the profile of brain tissue oxygenation during two different periods of and its relationship with established multimodal neuromonitoring variables.”; “Our study contributes with prospective data, integrating information from PbtO₂ with bedside continuous individualized cerebral perfusion pressure management and cerebrovascular autoregulation assessment.”;  Page 25- “Persistence of suboptimal PbtO₂ despite optimal perfusion management suggests that perfusion-based strategies alone may not fully address the mechanisms underlying cerebral hypoxia in ICH.” |
| Limitations | 19 | Discuss limitations of the study, taking into account sources of potential bias or imprecision. Discuss both direction and magnitude of any potential bias | Page 26- “The first limitation is that the PbtO₂ analysis relied on summary metrics representing extended time periods, which may obscure short-lived but clinically relevant episodes of hypoxemic hypoxia. Also, PbtO₂ monitoring was available in only a subset of patients due to limitation of devices availability, limiting statistical power and external validity.” |
| Interpretation | 20 | Give a cautious overall interpretation of results considering objectives, limitations, multiplicity of analyses, results from similar studies, and other relevant evidence | Page 24 and 25- “In this context, the observation that nearly half of patients exhibited PbtO₂ values below 22 mmHg during the first 48 hours, despite normal paO₂/fiO₂ ratios, highlights the dissociation between systemic oxygenation and cerebral tissue oxygenation in ICH. These results corroborate previous evidence, such as the study by Jung et al, which reported in an experimental model that, although paO₂ may have a statistically significant linear relationship with PbtO₂, it accounted for only a small proportion of the variance. Also, in our cohort, no association was observed between paO₂/fiO₂ ratio and PbtO₂ values. While the limited sample size may have reduced statistical power, this finding is also likely influenced by the relatively narrow range of systemic oxygenation values in a well-controlled intensive care environment. These results raise the hypothesis that cerebral hypoxia in ICH patients may not be primarily driven by arterial oxygenation but also by local and regional factors affecting oxygen delivery and utilization at the tissue level. In this cohort, PbtO₂ is more strongly associated with cerebral perfusion dynamics than with measures of systemic oxygenation. (…), higher PbtO₂ values clustered within a relatively specific CPP range, approximately centred around 85 mmHg, rather than increasing proportionally with CPP values. This pattern was particularly evident in patients with preserved cerebrovascular autoregulation, suggesting that the effectiveness of perfusion pressure augmentation in improving tissue oxygenation may depend on autoregulatory status. In the first 48 hours, with autoregulation preserved at the group level, the relationship between CPP and PbtO₂ was less distinct, although higher PbtO₂ values continued to be observed within a similar CPP range. According to this finding, there have been studies reporting a non-linear association between PbtO₂ and CPP, whereby PbtO₂ remained stable when CPP was at or above CPPopt but declined when CPP dropped below CPPopt in aneurysmal subarachnoid hemorrhage and traumatic brain injury.” |
| Generalisability | 21 | Discuss the generalisability (external validity) of the study results | Page 25- “Integrating PbtO₂ into a multimodal framework that includes CPP, and cerebrovascular autoregulation may help identify patients in whom conventional targets fail to ensure adequate tissue oxygenation and may guide more nuanced, patient-specific management strategies.”; Page 26- “The first limitation is that the PbtO₂ analysis relied on summary metrics representing extended time periods, which may obscure short-lived but clinically relevant episodes of hypoxemic hypoxia. Also, PbtO₂ monitoring was available in only a subset of patients due to limitation of devices availability, limiting statistical power and external validity.” |
| Other information | | | |
| Funding | 22 | Give the source of funding and the role of the funders for the present study and, if applicable, for the original study on which the present article is based | Page 2- “The study did not receive any funding or financial support.” |

*Give information separately for exposed and unexposed groups.

**Note:** An Explanation and Elaboration article discusses each checklist item and gives methodological background and published examples of transparent reporting. The STROBE checklist is best used in conjunction with this article (freely available on the Web sites of PLoS Medicine at http://www.plosmedicine.org/, Annals of Internal Medicine at http://www.annals.org/, and Epidemiology at http://www.epidem.com/). Information on the STROBE Initiative is available at http://www.strobe-statement.org.
